# Supplementary material
Source: PubMed Central journal article supplement (PMC7067063)
Supplement: NIHMS1053448-supplement-Supplemental_Material_1.pdf [file NIHMS1053448-supplement-Supplemental_Material_1.pdf]

## Supplementary Tables

*Supplementary Table 1.* Model fitting results for test of a single factor model of the CUDIT.

|          | $M_2^*$ | df | $p$   | RMSEA (90% CI)   | SRMSR | TLI  | CFI  |
|----------|---------|----|-------|------------------|-------|------|------|
| All Men  | 45.50   | 4  | <0.01 | 0.09 (0.07-0.11) | 0.08  | 0.89 | 0.97 |
| Dutch    | 19.32   | 4  | <0.01 | 0.11 (0.06-0.16) | 0.09  | 0.85 | 0.95 |
| Asian    | 5.81    | 4  | 0.21  | 0.04 (0.00-0.11) | 0.09  | 0.98 | 0.99 |
| African  | 4.27    | 4  | 0.37  | 0.01 (0.00-0.08) | 0.09  | 1.00 | 1.00 |
| Turkish  | 2.79    | 4  | 0.59  | 0.00 (0.00-0.10) | 0.09  | 1.04 | 1.00 |
| Moroccan | 23.15   | 4  | <0.01 | 0.17 (0.11-0.24) | 0.08  | 0.49 | 0.84 |

*Supplementary Table 2.* Tests of Item Monotonicity – Full Sample.

|               | $S_X^2$       | df        | RMSEA       | $p$             |
|---------------|---------------|-----------|-------------|-----------------|
| Item 1        | 54.11         | 42        | 0.01        | 0.10            |
| <b>Item 2</b> | <b>125.19</b> | <b>82</b> | <b>0.02</b> | <b>&lt;0.00</b> |
| Item 3        | 88.10         | 68        | 0.01        | 0.05            |
| Item 4        | 63.63         | 64        | 0.00        | 0.49            |
| Item 5        | 80.61         | 65        | 0.01        | 0.09            |
| Item 6        | 87.12         | 68        | 0.01        | 0.06            |
| <b>Item 7</b> | <b>129.37</b> | <b>82</b> | <b>0.02</b> | <b>&lt;0.00</b> |
| <b>Item 8</b> | <b>118.36</b> | <b>77</b> | <b>0.02</b> | <b>&lt;0.00</b> |
| Item 10       | 25.55         | 24        | 0.01        | 0.38            |

*Note:* Bold text indicates an RMSEA value significantly different from 0.

*Supplementary Table 3a. Tests of item monotonicity – Dutch origin sample.*

|               | S_X <sup>2</sup> | df        | RMSEA       | p               |
|---------------|------------------|-----------|-------------|-----------------|
| Item 1        | 24.46            | 15        | 0.04        | 0.06            |
| <b>Item 2</b> | <b>30.98</b>     | <b>14</b> | <b>0.06</b> | <b>&lt;0.01</b> |
| Item 3        | 21.72            | 17        | 0.03        | 0.20            |
| Item 4        | 14.97            | 10        | 0.04        | 0.13            |
| <b>Item 5</b> | <b>22.06</b>     | <b>6</b>  | <b>0.09</b> | <b>&lt;0.01</b> |
| Item 6        | 9.08             | 6         | 0.04        | 0.17            |
| Item 7        | 26.20            | 17        | 0.04        | 0.07            |
| Item 8        | 21.03            | 12        | 0.05        | 0.05            |
| Item 10       | 16.05            | 12        | 0.03        | 0.19            |

*Note:* Bold text indicates an RMSEA value significantly different from 0.

*Supplementary Table 3b. Tests of item monotonicity – African Surinamese sample.*

|               | S_X <sup>2</sup> | df        | RMSEA       | p           |
|---------------|------------------|-----------|-------------|-------------|
| Item 1        | 22.46            | 22        | 0.01        | 0.43        |
| Item 2        | 61.42            | 45        | 0.03        | 0.05        |
| Item 3        | 57.25            | 45        | 0.03        | 0.10        |
| Item 4        | 29.33            | 32        | 0.00        | 0.60        |
| Item 5        | 33.04            | 27        | 0.02        | 0.20        |
| <b>Item 6</b> | <b>52.95</b>     | <b>36</b> | <b>0.03</b> | <b>0.03</b> |
| Item 7        | 49.12            | 39        | 0.02        | 0.13        |
| Item 8        | 46.87            | 38        | 0.02        | 0.15        |
| Item 10       | 22.12            | 20        | 0.02        | 0.33        |

*Note:* Bold text indicates an RMSEA value significantly different from 0.

*Supplementary Table 3c. Tests of item monotonicity – South-Asian Surinamese sample.*

|         | S_X <sup>2</sup> | df | RMSEA | p    |
|---------|------------------|----|-------|------|
| Item 1  | 9.86             | 16 | 0.00  | 0.87 |
| Item 2  | 26.58            | 22 | 0.03  | 0.23 |
| Item 3  | 30.77            | 31 | 0.00  | 0.48 |
| Item 4  | 23.31            | 20 | 0.03  | 0.27 |
| Item 5  | 13.82            | 14 | 0.00  | 0.46 |
| Item 6  | 20.26            | 17 | 0.03  | 0.26 |
| Item 7  | 26.86            | 19 | 0.04  | 0.11 |
| Item 8  | 27.58            | 18 | 0.05  | 0.07 |
| Item 10 | 9.81             | 18 | 0.00  | 0.94 |

*Note:* Bold text indicates an RMSEA value significantly different from 0.

*Supplementary Table 3d. Tests of item monotonicity – Turkish sample.*

|               | S_X <sup>2</sup> | df        | RMSEA       | p           |
|---------------|------------------|-----------|-------------|-------------|
| Item 1        | 19.70            | 18        | 0.02        | 0.35        |
| Item 2        | 23.75            | 16        | 0.06        | 0.10        |
| Item 3        | 24.84            | 19        | 0.05        | 0.17        |
| Item 4        | 16.54            | 15        | 0.03        | 0.35        |
| Item 5        | 18.56            | 15        | 0.04        | 0.23        |
| Item 6        | 10.55            | 10        | 0.02        | 0.39        |
| Item 7        | 20.81            | 20        | 0.02        | 0.41        |
| <b>Item 8</b> | <b>27.51</b>     | <b>16</b> | <b>0.07</b> | <b>0.04</b> |
| Item 10       | 15.73            | 10        | 0.06        | 0.11        |

*Note:* Bold text indicates an RMSEA value significantly different from 0.

*Supplementary Table 3e. Tests of item monotonicity – Moroccan sample.*

|         | S_X <sup>2</sup> | df | RMSEA | p    |
|---------|------------------|----|-------|------|
| Item 1  | 20.67            | 19 | 0.02  | 0.36 |
| Item 2  | 30.13            | 26 | 0.03  | 0.26 |
| Item 3  | 22.72            | 24 | 0.00  | 0.54 |
| Item 4  | 29.62            | 25 | 0.03  | 0.24 |
| Item 5  | 20.76            | 17 | 0.04  | 0.24 |
| Item 6  | 20.46            | 12 | 0.06  | 0.06 |
| Item 7  | 27.04            | 29 | 0.00  | 0.57 |
| Item 8  | 16.54            | 24 | 0.00  | 0.87 |
| Item 10 | 10.06            | 15 | 0.00  | 0.82 |

*Note:* Bold text indicates an RMSEA value significantly different from 0.

Supplementary Table 4. Pairwise DIF contrasts of CUDIT items as a function of ethnic group membership in male cannabis users.

4a. Dutch vs. African Surinamese

| Items                           | Omnibus Test    |              | <i>a</i>        |          | <i>b</i> <sub>1</sub> |              | <i>b</i> <sub>2</sub> |              | <i>b</i> <sub>3</sub> |              | <i>b</i> <sub>4</sub> |          |
|---------------------------------|-----------------|--------------|-----------------|----------|-----------------------|--------------|-----------------------|--------------|-----------------------|--------------|-----------------------|----------|
|                                 | $\Delta \chi^2$ | <i>p</i>     | $\Delta \chi^2$ | <i>p</i> | $\Delta \chi^2$       | <i>p</i>     | $\Delta \chi^2$       | <i>p</i>     | $\Delta \chi^2$       | <i>p</i>     | $\Delta \chi^2$       | <i>p</i> |
| 1 frequency of use              | <b>13.801</b>   | <b>0.008</b> | 2.533           | 0.111    | <b>4.109</b>          | <b>0.043</b> | <b>8.382</b>          | <b>0.004</b> | <b>4.827</b>          | <b>0.028</b> |                       |          |
| 2 usual hours being stoned      | 8.530           | 0.074        | 1.975           | 0.160    | <b>6.548</b>          | <b>0.010</b> | 1.677                 | 0.195        | 0.807                 | 0.369        | 2.467                 | 0.116    |
| 3 stoned for 6 or more hours    | <b>15.954</b>   | <b>0.003</b> | 0.182           | 0.670    | 2.612                 | 0.106        | 0.080                 | 0.777        | 0.009                 | 0.924        | 0.050                 | 0.823    |
| 4 not able to stop              | -               | -            | -               | -        | -                     | -            | -                     | -            | -                     | -            | -                     | -        |
| 5 failed to do what expected    | <b>14.692</b>   | <b>0.005</b> | 0.911           | 0.340    | 0.045                 | 0.832        | 0.898                 | 0.343        | 0.464                 | 0.496        | 1.144                 | 0.285    |
| 6 morning use                   | -               | -            | -               | -        | -                     | -            | -                     | -            | -                     | -            | -                     | -        |
| 7 guilt/remorse                 | <b>41.493</b>   | <b>0.000</b> | 0.400           | 0.527    | <b>5.140</b>          | <b>0.023</b> | 0.047                 | 0.828        | 0.009                 | 0.924        | 0.990                 | 0.320    |
| 8 memory/concentration problems | <b>34.353</b>   | <b>0.000</b> | 0.592           | 0.442    | 2.378                 | 0.123        | 0.018                 | 0.893        | 0.243                 | 0.622        | 2.444                 | 0.118    |
| 10 concerned others             | -               | -            | -               | -        | -                     | -            |                       |              |                       |              |                       |          |

4b. Dutch vs. South-Asian Surinamese

| Items                           | Omnibus Test    |              | <i>a</i>        |          | <i>b</i> <sub>1</sub> |              | <i>b</i> <sub>2</sub> |          | <i>b</i> <sub>3</sub> |          | <i>b</i> <sub>4</sub> |          |
|---------------------------------|-----------------|--------------|-----------------|----------|-----------------------|--------------|-----------------------|----------|-----------------------|----------|-----------------------|----------|
|                                 | $\Delta \chi^2$ | <i>p</i>     | $\Delta \chi^2$ | <i>p</i> | $\Delta \chi^2$       | <i>p</i>     | $\Delta \chi^2$       | <i>p</i> | $\Delta \chi^2$       | <i>p</i> | $\Delta \chi^2$       | <i>p</i> |
| 1 frequency of use              | <b>11.289</b>   | <b>0.023</b> | 1.368           | 0.242    | 0.320                 | 0.571        | 3.769                 | 0.052    | 2.989                 | 0.084    |                       |          |
| 2 usual hours being stoned      | 4.513           | 0.341        | 1.699           | 0.192    | 2.478                 | 0.115        | 0.522                 | 0.470    | 0.233                 | 0.630    | 0.252                 | 0.616    |
| 3 stoned for 6 or more hours    | <b>17.739</b>   | <b>0.001</b> | 0.230           | 0.631    | 0.380                 | 0.538        | 0.522                 | 0.470    | 1.390                 | 0.238    | 1.860                 | 0.173    |
| 4 not able to stop              | -               | -            | -               | -        | -                     | -            | -                     | -        | -                     | -        | -                     | -        |
| 5 failed to do what expected    | <b>11.093</b>   | <b>0.026</b> | 1.620           | 0.203    | 0.086                 | 0.770        | 1.382                 | 0.240    | 0.366                 | 0.545    | 2.017                 | 0.156    |
| 6 morning use                   | -               | -            | -               | -        | -                     | -            | -                     | -        | -                     | -        | -                     | -        |
| 7 guilt/remorse                 | <b>27.012</b>   | <b>0.000</b> | -0.020          | 1.000    | <b>4.704</b>          | <b>0.030</b> | 0.394                 | 0.530    | -0.017                | 1.000    | 0.734                 | 0.391    |
| 8 memory/concentration problems | <b>25.778</b>   | <b>0.000</b> | 0.008           | 0.927    | 3.049                 | 0.081        | 0.013                 | 0.909    | -0.005                | 1.000    | 0.599                 | 0.439    |
| 10 concerned others             | -               | -            | -               | -        | -                     | -            |                       |          |                       |          |                       |          |

Note:  $\Delta \chi^2$  – change in chi-square statistic between models freely estimating and constraining parameters to be equal; *a* - discrimination parameter; *b*<sub>1-4</sub> - difficulty parameters for transition between response levels for each item; bold text indicates nominal significance at *p*<0.05. Items 3 and 6 were selected as anchor items, and thus were not tested for DIF.

## 4c. Dutch vs. Turkish

| Items                           | Omnibus Test    |              | <i>a</i>        |          | <i>b</i> <sub>1</sub> |          | <i>b</i> <sub>2</sub> |          | <i>b</i> <sub>3</sub> |          | <i>b</i> <sub>4</sub> |              |
|---------------------------------|-----------------|--------------|-----------------|----------|-----------------------|----------|-----------------------|----------|-----------------------|----------|-----------------------|--------------|
|                                 | $\Delta \chi^2$ | <i>p</i>     | $\Delta \chi^2$ | <i>p</i> | $\Delta \chi^2$       | <i>p</i> | $\Delta \chi^2$       | <i>p</i> | $\Delta \chi^2$       | <i>p</i> | $\Delta \chi^2$       | <i>p</i>     |
| 1 frequency of use              | <b>12.649</b>   | <b>0.013</b> | 0.052           | 0.819    | 2.732                 | 0.098    | 0.127                 | 0.722    | 1.402                 | 0.236    |                       |              |
| 2 usual hours being stoned      | 3.762           | 0.439        | 0.251           | 0.617    | 0.292                 | 0.589    | -0.007                | 1.000    | 0.438                 | 0.508    | 0.246                 | 0.620        |
| 3 stoned for 6 or more hours    | 5.515           | 0.238        | 0.085           | 0.771    | 1.590                 | 0.207    | 0.265                 | 0.607    | 0.058                 | 0.810    | 0.086                 | 0.770        |
| 4 not able to stop              | -               | -            | -               | -        | -                     | -        | -                     | -        | -                     | -        | -                     | -            |
| 5 failed to do what expected    | 3.241           | 0.518        | 1.453           | 0.228    | 1.608                 | 0.205    | 2.662                 | 0.103    | 2.752                 | 0.097    | <b>4.069</b>          | <b>0.044</b> |
| 6 morning use                   | -               | -            | -               | -        | -                     | -        | -                     | -        | -                     | -        | -                     | -            |
| 7 guilt/remorse                 | <b>11.388</b>   | <b>0.023</b> | 0.589           | 0.443    | 0.009                 | 0.926    | 1.860                 | 0.173    | 2.592                 | 0.107    | <b>4.151</b>          | <b>0.042</b> |
| 8 memory/concentration problems | 1.705           | 0.790        | 0.587           | 0.444    | 0.177                 | 0.674    | 0.780                 | 0.377    | 0.545                 | 0.461    | 1.725                 | 0.189        |
| 10 concerned others             | -               | -            | -               | -        | -                     | -        |                       |          |                       |          |                       |              |

## 4d. Dutch vs. Moroccan

| Items                           | Omnibus Test    |              | <i>a</i>        |          | <i>b</i> <sub>1</sub> |              | <i>b</i> <sub>2</sub> |          | <i>b</i> <sub>3</sub> |          | <i>b</i> <sub>4</sub> |          |
|---------------------------------|-----------------|--------------|-----------------|----------|-----------------------|--------------|-----------------------|----------|-----------------------|----------|-----------------------|----------|
|                                 | $\Delta \chi^2$ | <i>p</i>     | $\Delta \chi^2$ | <i>p</i> | $\Delta \chi^2$       | <i>p</i>     | $\Delta \chi^2$       | <i>p</i> | $\Delta \chi^2$       | <i>p</i> | $\Delta \chi^2$       | <i>p</i> |
| 1 frequency of use              | 1.679           | 0.794        | 0.037           | 0.848    | 0.784                 | 0.376        | 0.160                 | 0.689    | 0.300                 | 0.584    |                       |          |
| 2 usual hours being stoned      | <b>12.995</b>   | <b>0.011</b> | 0.011           | 0.917    | <b>3.928</b>          | <b>0.047</b> | 0.256                 | 0.613    | 1.435                 | 0.231    | 1.504                 | 0.220    |
| 3 stoned for 6 or more hours    | <b>15.210</b>   | <b>0.004</b> | -0.007          | 1.000    | 1.467                 | 0.226        | 0.003                 | 0.953    | 0.158                 | 0.691    | -0.004                | 1.000    |
| 4 not able to stop              | -               | -            | -               | -        | -                     | -            | -                     | -        | -                     | -        | -                     | -        |
| 5 failed to do what expected    | 3.712           | 0.446        | -0.002          | 1.000    | 0.359                 | 0.549        | -0.010                | 1.000    | 0.002                 | 0.964    | 0.417                 | 0.519    |
| 6 morning use                   | -               | -            | -               | -        | -                     | -            | -                     | -        | -                     | -        | -                     | -        |
| 7 guilt/remorse                 | <b>13.453</b>   | <b>0.009</b> | -0.012          | 1.000    | 0.016                 | 0.901        | 0.907                 | 0.341    | 1.181                 | 0.277    | 3.536                 | 0.060    |
| 8 memory/concentration problems | <b>11.364</b>   | <b>0.023</b> | -0.012          | 1.000    | 1.141                 | 0.285        | -0.014                | 1.000    | 0.071                 | 0.791    | 1.036                 | 0.309    |
| 10 concerned others             | -               | -            | -               | -        | -                     | -            |                       |          |                       |          |                       |          |

*Note:*  $\Delta \chi^2$  – change in chi-square statistic between models freely estimating and constraining parameters to be equal; *a* - discrimination parameter; *b*<sub>1-4</sub> - difficulty parameters for transition between response levels for each item; bold text indicates nominal significance at *p*<0.05. Items 3 and 6 were selected as anchor items, and thus were not tested for DIF.

*Supplementary Table 5. Scale- and item-level effect size estimates for the CUDIT across ethnic groups.*

| <i>Scale-Level Effect Sizes</i> |                           |  |                               |  |                |  |                 |  |
|---------------------------------|---------------------------|--|-------------------------------|--|----------------|--|-----------------|--|
|                                 | <u>African Surinamese</u> |  | <u>South-Asian Surinamese</u> |  | <u>Turkish</u> |  | <u>Moroccan</u> |  |
| STDS                            | -0.43                     |  | -0.15                         |  | -0.17          |  | -0.20           |  |
| UTDS                            | 1.22                      |  | 0.94                          |  | 0.69           |  | 1.09            |  |

  

| <i>Item-Level Effect Sizes</i> |                           |             |                               |             |                |             |                 |             |
|--------------------------------|---------------------------|-------------|-------------------------------|-------------|----------------|-------------|-----------------|-------------|
|                                | <u>African Surinamese</u> |             | <u>South-Asian Surinamese</u> |             | <u>Turkish</u> |             | <u>Moroccan</u> |             |
|                                | <u>SIDS</u>               | <u>UIDS</u> | <u>SIDS</u>                   | <u>UIDS</u> | <u>SIDS</u>    | <u>UIDS</u> | <u>SIDS</u>     | <u>UIDS</u> |
| Item 1                         | 0.31                      | 0.32        | 0.22                          | 0.24        | -0.21          | 0.21        | -0.10           | 0.10        |
| Item 2                         | -0.12                     | 0.16        | 0.03                          | 0.16        | -0.09          | 0.09        | -0.30           | 0.30        |
| Item 3                         | -0.02                     | 0.14        | 0.06                          | 0.06        | -0.11          | 0.12        | -0.14           | 0.14        |
| Item 4                         | -                         | -           | -                             | -           | -              | -           | -               | -           |
| Item 5                         | -0.10                     | 0.10        | -0.11                         | 0.12        | 0.10           | 0.10        | -0.03           | 0.06        |
| Item 6                         | -                         | -           | -                             | -           | -              | -           | -               | -           |
| Item 7                         | -0.28                     | 0.28        | -0.19                         | 0.19        | 0.14           | 0.14        | 0.38            | 0.38        |
| Item 8                         | -0.23                     | 0.23        | -0.17                         | 0.18        | 0.01           | 0.03        | -0.02           | 0.12        |
| Item 10                        | -                         | -           | -                             | -           | -              | -           | -               | -           |

*Note:* All effects sizes are estimated using Dutch origin participants as the reference group. STDS – Signed Test Difference in the Sample; UTDS – Unsigned Test Difference in the Sample; SIDS – Signed Item Difference in the Sample; UIDS – Unsigned Item Difference in the Sample

Supplementary Table 6. Parameter estimates for male participants in the final graded response multiple group IRT model.

4a. Dutch ( $n=344$ )

| Item | $a$         | $b_1$        | $b_2$       | $b_3$       | $b_4$       |
|------|-------------|--------------|-------------|-------------|-------------|
| 1    | 2.16 (0.28) | -0.02 (0.09) | 0.68 (0.10) | 1.01 (0.11) |             |
| 2    | 1.56 (0.22) | 0.63 (0.11)  | 2.08 (0.24) | 2.85 (0.34) | 3.08 (0.38) |
| 3    | 2.91 (0.41) | 0.78 (0.09)  | 1.47 (0.13) | 1.80 (0.15) | 2.14 (0.19) |
| 4    | 3.47 (0.43) | 1.34 (0.09)  | 1.62 (0.11) | 1.73 (0.12) | 1.89 (0.13) |
| 5    | 2.80 (0.49) | 1.53 (0.14)  | 2.30 (0.23) | 2.42 (0.25) | 3.23 (0.47) |
| 6    | 3.02 (0.38) | 1.69 (0.11)  | 1.96 (0.14) | 2.08 (0.15) | 2.32 (0.17) |
| 7    | 2.25 (0.32) | 1.06 (0.11)  | 1.84 (0.18) | 2.26 (0.22) | 2.92 (0.34) |
| 8    | 2.87 (0.43) | 1.06 (0.10)  | 1.85 (0.16) | 2.17 (0.20) | 2.95 (0.34) |
| 10   | 1.96 (0.25) | 1.99 (0.15)  |             |             |             |

4b. African Surinamese ( $n=453$ )

| Item | $a$         | $b_1$        | $b_2$       | $b_3$       | $b_4$       |
|------|-------------|--------------|-------------|-------------|-------------|
| 1    | 1.48 (0.27) | -0.59 (0.29) | 0.10 (0.19) | 0.79 (0.12) |             |
| 2    | 2.04 (0.36) | 0.94 (0.11)  | 1.89 (0.17) | 2.42 (0.24) | 2.87 (0.31) |
| 3    | 3.07 (0.53) | 1.05 (0.10)  | 1.42 (0.11) | 1.62 (0.13) | 1.89 (0.15) |
| 4    | 3.47 (0.43) | 1.34 (0.09)  | 1.62 (0.11) | 1.73 (0.12) | 1.89 (0.13) |
| 5    | 2.15 (0.42) | 2.04 (0.19)  | 2.50 (0.26) | 2.77 (0.31) | 3.44 (0.46) |
| 6    | 3.02 (0.38) | 1.69 (0.11)  | 1.96 (0.14) | 2.08 (0.15) | 2.32 (0.17) |
| 7    | 1.90 (0.36) | 1.85 (0.17)  | 2.23 (0.22) | 2.60 (0.28) | 2.94 (0.34) |
| 8    | 2.35 (0.43) | 1.71 (0.14)  | 2.17 (0.20) | 2.41 (0.23) | 2.74 (0.29) |
| 10   | 1.96 (0.25) | 1.99 (0.15)  |             |             |             |

4c. South-Asian Surinamese ( $n=251$ )

| Item | $a$         | $b_1$        | $b_2$       | $b_3$       | $b_4$       |
|------|-------------|--------------|-------------|-------------|-------------|
| 1    | 1.53 (0.33) | -0.26 (0.27) | 0.26 (0.19) | 0.78 (0.15) |             |
| 2    | 2.01 (0.40) | 0.78 (0.14)  | 1.76 (0.17) | 2.31 (0.25) | 2.51 (0.28) |
| 3    | 2.42 (0.48) | 1.04 (0.12)  | 1.41 (0.13) | 1.59 (0.14) | 1.87 (0.18) |
| 4    | 3.47 (0.43) | 1.34 (0.09)  | 1.62 (0.11) | 1.73 (0.12) | 1.89 (0.13) |
| 5    | 1.92 (0.42) | 2.04 (0.21)  | 2.62 (0.31) | 3.10 (0.41) | 3.51 (0.50) |
| 6    | 3.02 (0.38) | 1.69 (0.11)  | 1.96 (0.14) | 2.08 (0.15) | 2.32 (0.17) |
| 7    | 2.11 (0.44) | 1.70 (0.16)  | 2.13 (0.22) | 2.30 (0.25) | 2.60 (0.30) |
| 8    | 2.62 (0.53) | 1.63 (0.14)  | 2.02 (0.19) | 2.25 (0.22) | 2.70 (0.29) |
| 10   | 1.96 (0.25) | 1.99 (0.15)  |             |             |             |

4d. Moroccan ( $n=175$ )

| Item | $a$         | $b_1$       | $b_2$       | $b_3$       | $b_4$       |
|------|-------------|-------------|-------------|-------------|-------------|
| 1    | 2.22 (0.50) | 0.18 (0.23) | 0.75 (0.16) | 1.12 (0.13) |             |
| 2    | 1.57 (0.37) | 1.19 (0.15) | 2.25 (0.25) | 3.39 (0.49) | 3.69 (0.57) |
| 3    | 2.70 (0.57) | 1.15 (0.12) | 1.58 (0.13) | 1.71 (0.15) | 2.19 (0.21) |
| 4    | 3.47 (0.43) | 1.34 (0.09) | 1.62 (0.11) | 1.73 (0.12) | 1.89 (0.13) |
| 5    | 2.86 (0.65) | 1.73 (0.15) | 2.25 (0.21) | 2.42 (0.24) | 2.76 (0.30) |
| 6    | 3.02 (0.38) | 1.69 (0.11) | 1.96 (0.14) | 2.08 (0.15) | 2.32 (0.17) |
| 7    | 2.19 (0.47) | 1.11 (0.13) | 1.50 (0.14) | 1.83 (0.17) | 2.04 (0.19) |
| 8    | 2.83 (0.60) | 1.39 (0.12) | 1.83 (0.16) | 2.05 (0.18) | 2.42 (0.24) |
| 10   | 1.96 (0.25) | 1.99 (0.15) |             |             |             |

4.e Turkish ( $n=157$ )

| Item | $a$         | $b_1$       | $b_2$       | $b_3$       | $b_4$       |
|------|-------------|-------------|-------------|-------------|-------------|
| 1    | 2.26 (0.50) | 0.36 (0.20) | 0.73 (0.16) | 1.29 (0.14) |             |
| 2    | 1.34 (0.35) | 0.91 (0.18) | 2.42 (0.36) | 2.95 (0.48) | 3.30 (0.56) |
| 3    | 3.12 (0.72) | 1.07 (0.13) | 1.55 (0.14) | 1.77 (0.16) | 2.13 (0.21) |
| 4    | 3.47 (0.43) | 1.34 (0.09) | 1.62 (0.11) | 1.73 (0.12) | 1.89 (0.13) |
| 5    | 1.98 (0.47) | 1.58 (0.17) | 2.31 (0.28) | 2.44 (0.30) | 3.03 (0.43) |
| 6    | 3.02 (0.38) | 1.69 (0.11) | 1.96 (0.14) | 2.08 (0.15) | 2.32 (0.17) |
| 7    | 1.80 (0.41) | 1.26 (0.15) | 1.70 (0.19) | 2.03 (0.23) | 2.46 (0.31) |
| 8    | 2.33 (0.51) | 1.15 (0.14) | 1.88 (0.19) | 2.30 (0.25) | 2.81 (0.35) |
| 10   | 1.96 (0.25) | 1.99 (0.15) |             |             |             |

*Note:*  $a$  - discrimination parameter;  $b_{1-4}$  - difficulty parameters for transition between response levels for each item. Items 4, 6, and 10 were selected as anchor items, and thus are constrained to be equal across groups.



### **Supplementary Figure Captions**

*Supplementary Figure 1.* Item characteristic curve for CUDIT Item 1 by ethnic group membership.

*Supplementary Figure 2.* Item characteristic curve for CUDIT Item 7 by ethnic group membership.
