# Supplementary material
Source: PubMed Central journal article supplement (PMC7067063)

# CUDIT Item 1 Response

Frequency of Use

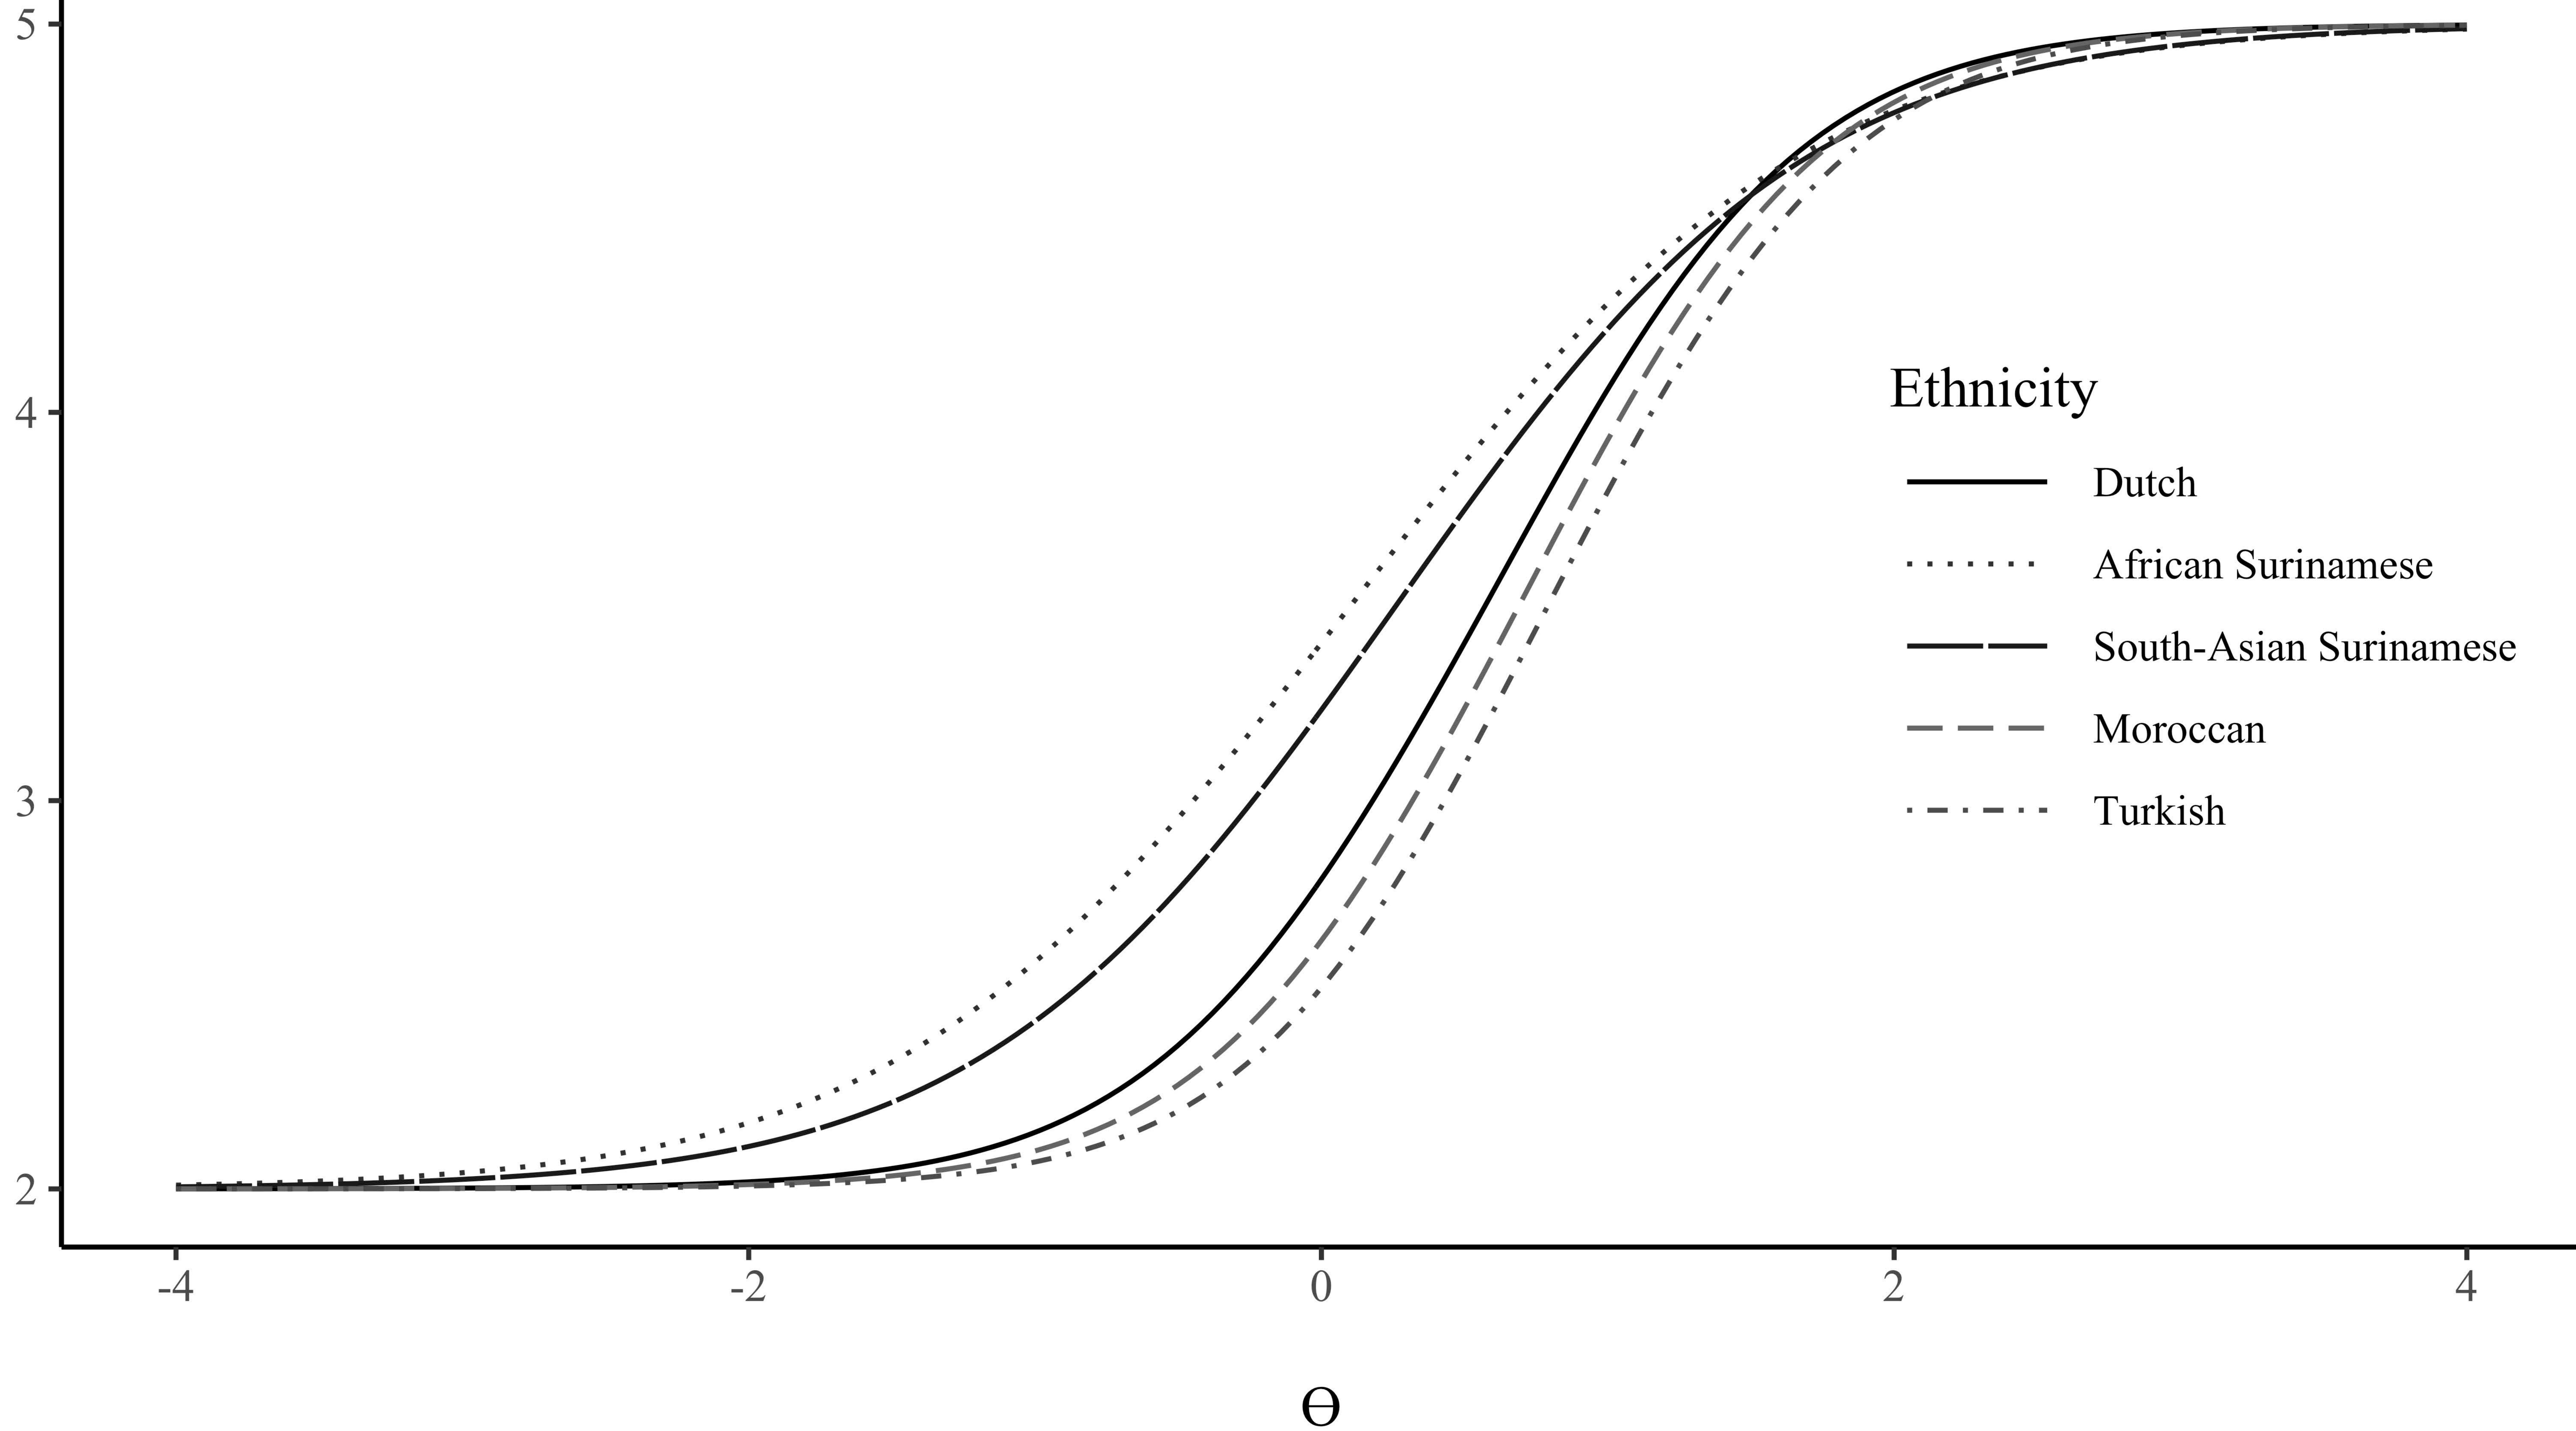

Supplement: NIHMS1053448-supplement-Supplemental_Material_2.pdf [file NIHMS1053448-supplement-Supplemental_Material_2.pdf]

# CUDIT Item 7 Response

Guilt/Remorse

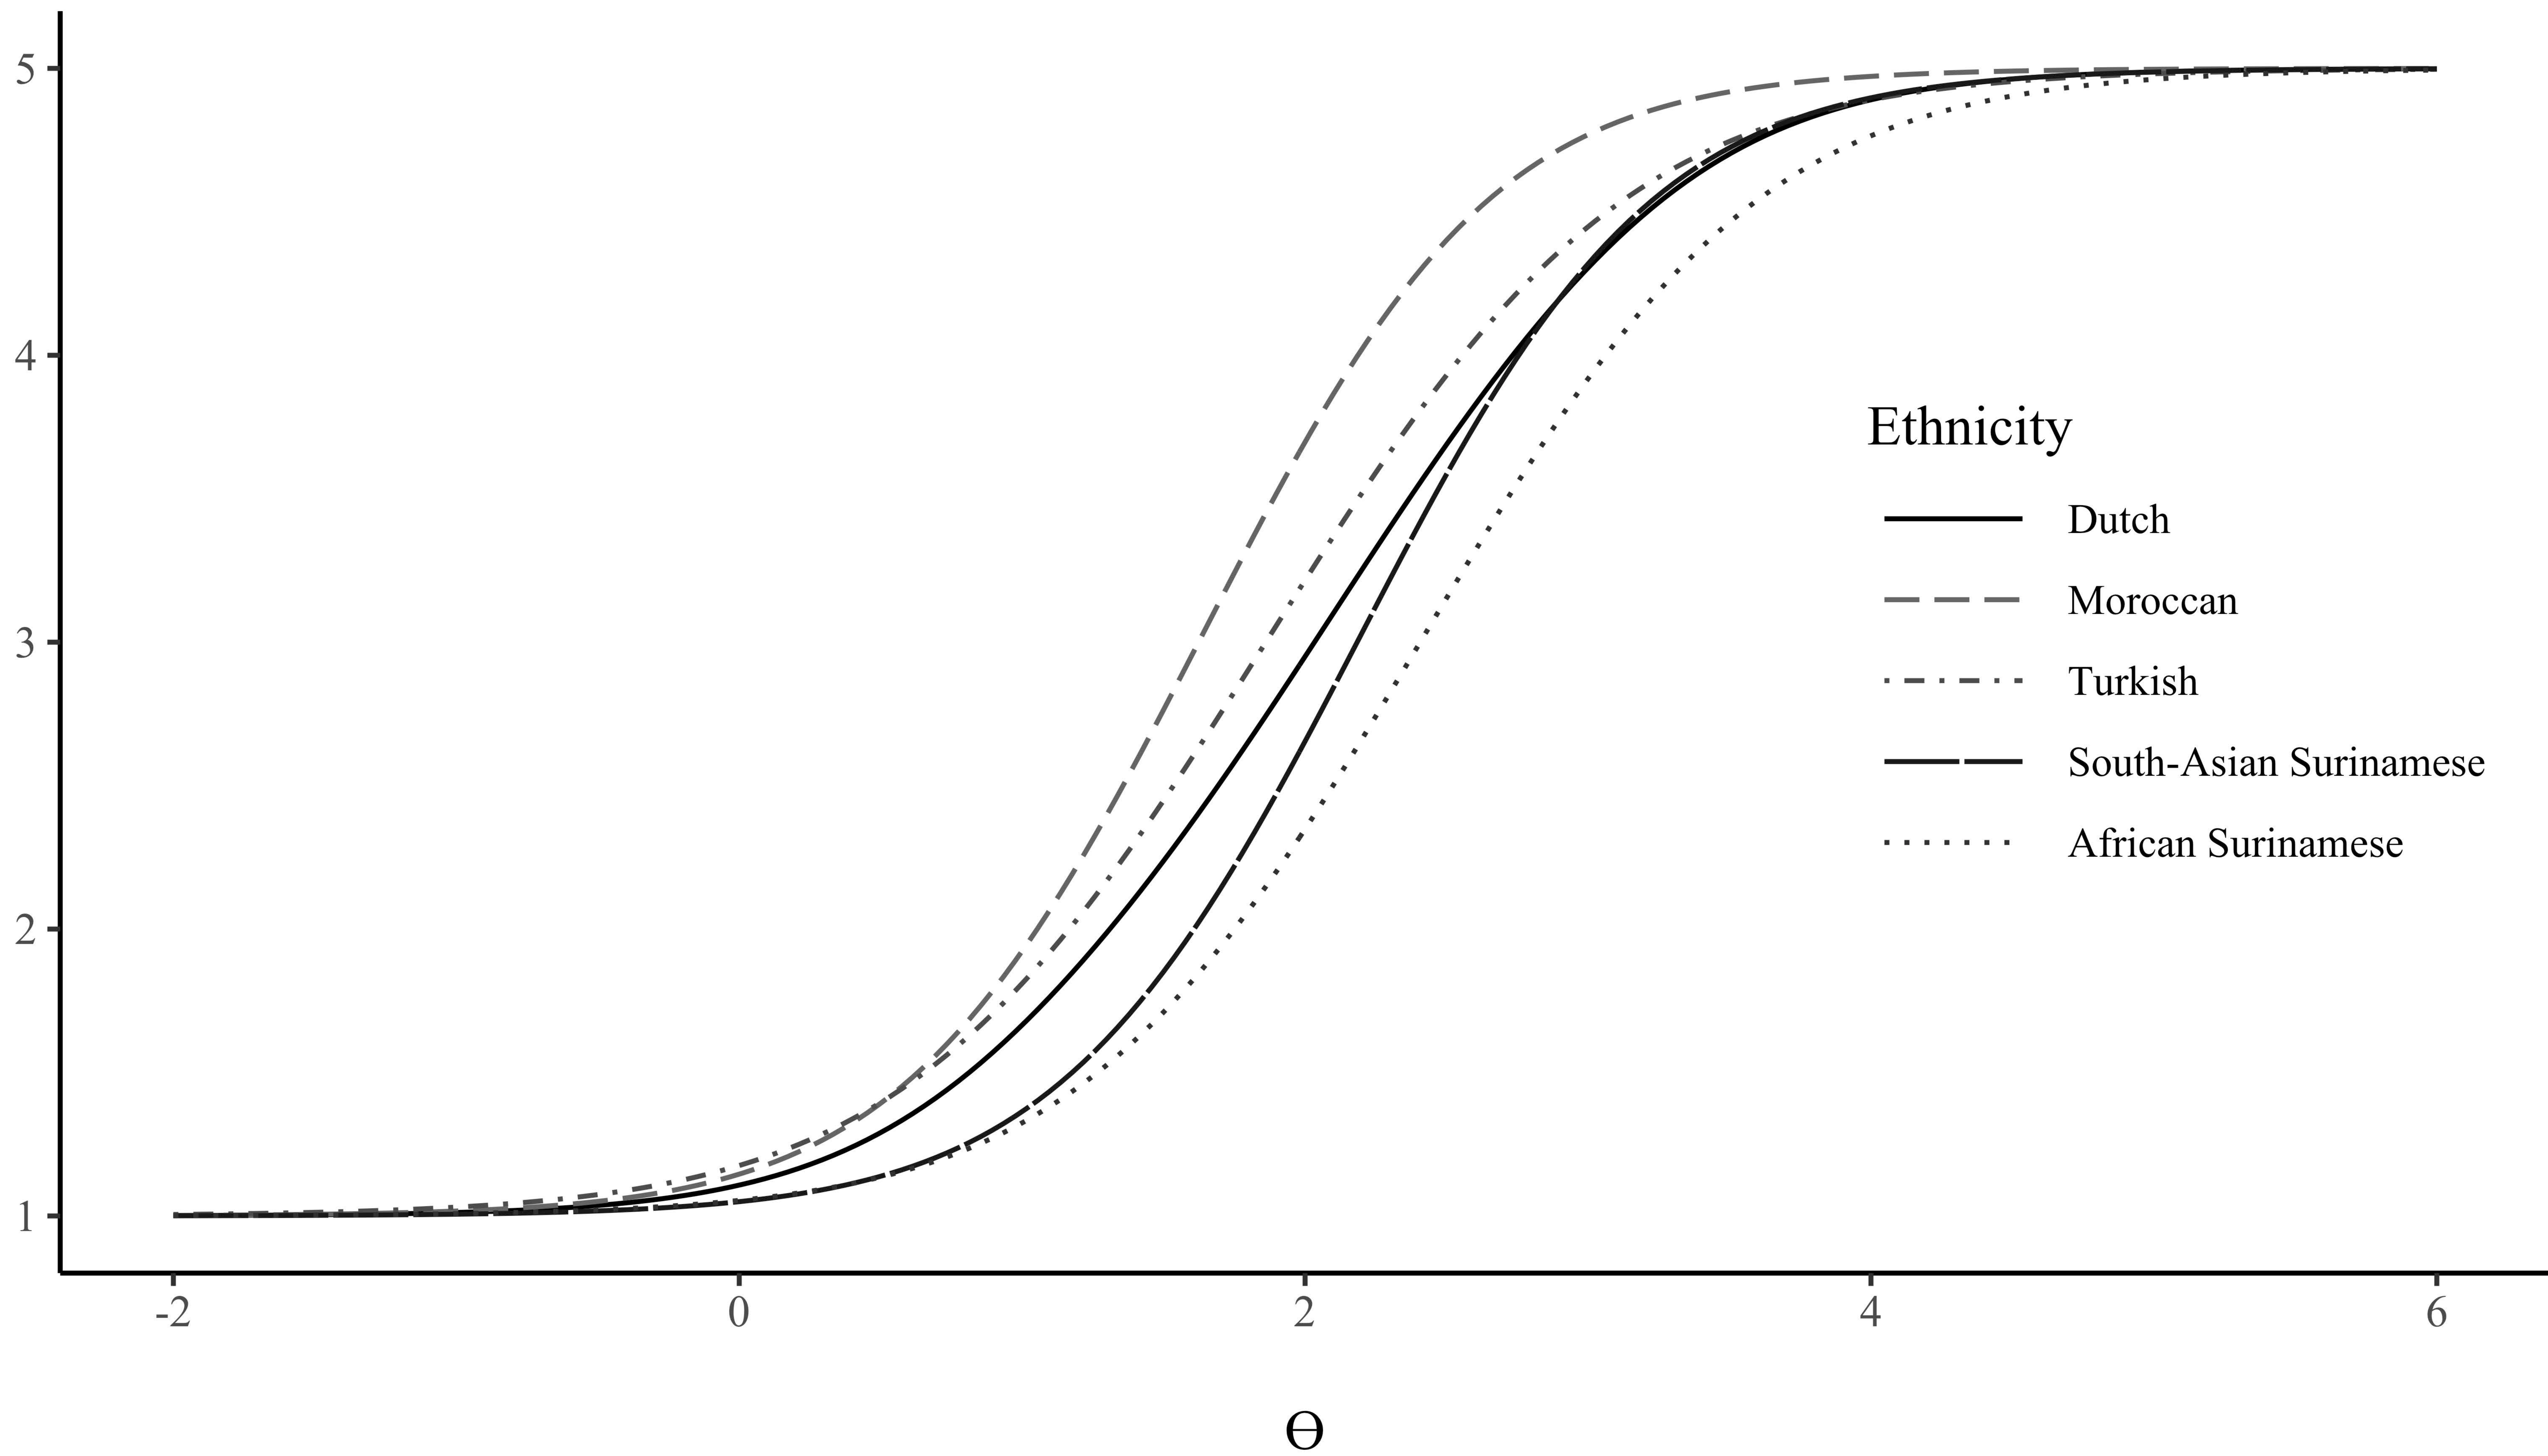

Supplement: NIHMS1053448-supplement-Supplemental_Material_3.pdf [file NIHMS1053448-supplement-Supplemental_Material_3.pdf]
